# Supplementary material for: Strategic Processing of Gender Stereotypes in Sentence Comprehension: An ERP Study
Source: MDPI journal article supplement (doi:10.3390/brainsci13040560), 2023-03-27
Supplement: s1 [file s1]

# Supplementary materials

Table S1: Summary of cumulative link mixed model fitted with the Laplace approximation for the rating scores in the pretest of plausibility. Summary of model produced by the call `clmm (formula = rating ~ Consistency * Proportion * Order + (Consistency + Proportion | subject) + (Consistency + Order | item), data = cv_rating_clm`

|       |           |      |          |         |             |          |         |
|-------|-----------|------|----------|---------|-------------|----------|---------|
| link  | threshold | nobs | logLik   | AIC     | niter       | max.grad | cond.H  |
| logit | flexible  | 5120 | -2794.92 | 5635.85 | 4354(52424) | 1.30e-03 | 6.5e+02 |

Random effects:

| Groups  | Name                    | Variance | Std.Dev. | Corr          |
|---------|-------------------------|----------|----------|---------------|
| item    | (Intercept)             | 0.37097  | 0.6091   |               |
|         | Consistency[consistent] | 0.36790  | 0.6065   | -0.972        |
|         | Order[High-equal]       | 0.05098  | 0.2258   | -0.219 -0.015 |
| subject | (Intercept)             | 8.20372  | 2.8642   |               |
|         | Consistency[consistent] | 0.51182  | 0.7154   | 0.128         |
|         | Proportion[High]        | 0.08532  | 0.2921   | 0.129 0.449   |

Number of groups: item 160, subject 32

Coefficients:

|                                                            | Estimate | Std. Error | z value | Pr(> z ) |
|------------------------------------------------------------|----------|------------|---------|----------|
| Consistency[consistent]                                    | 1.11873  | 0.17652    | 6.338   | 2.33e-10 |
| Proportion[High]                                           | 0.04240  | 0.10024    | 0.423   | 0.67228  |
| Order[High-equal]                                          | -0.19212 | 0.51807    | -0.371  | 0.71077  |
| Consistency[consistent]:Proportion[High]                   | 0.05830  | 0.06617    | 0.881   | 0.37829  |
| Consistency[consistent]:Order[High-equal]                  | -0.14301 | 0.15435    | -0.927  | 0.35418  |
| Proportion[High]:Order[High-equal]                         | -0.23062 | 0.08062    | -2.860  | 0.00423  |
| Consistency[consistent]:Proportion[High]:Order[High-equal] | 0.07767  | 0.04512    | 1.721   | 0.08516  |

Threshold coefficients:

|     | Estimate | Std. Error | z value |
|-----|----------|------------|---------|
| 1 2 | -9.4237  | 0.5832     | -16.160 |
| 2 3 | -6.3411  | 0.5360     | -11.829 |
| 3 4 | -4.9764  | 0.5307     | -9.376  |
| 4 5 | -2.1179  | 0.5244     | -4.039  |

Table S2: Summary of linear mixed effect model for the N400 (300–600 ms) time window. Summary of model produced by the call `lmer (formula = scale(N400) ~ scale(BL) * Consistency * Proportion * Order * scale(cloze) + (Proportion | subject) + (1 | item), data = cv.N400, REML = FALSE, control = lmerControl(optimizer = "bobyqa", optCtrl = list(maxfun = 1e+06)))`

Linear mixed model fit by maximum likelihood . t-tests use Satterthwaite’s method

| AIC   | BIC   | logLik | deviance | df.resid |
|-------|-------|--------|----------|----------|
| 16275 | 16528 | -8100  | 16201    | 7027     |

Scaled residuals:

| Min  | 1Q    | Median | 3Q   | Max  |
|------|-------|--------|------|------|
| -5.4 | -0.63 | -0.01  | 0.63 | 4.76 |

Random effects:

| Groups   | Name             | Variance | Std.Dev. | Corr  |
|----------|------------------|----------|----------|-------|
| item     | (Intercept)      | 0.0032   | 0.0566   |       |
| subject  | (Intercept)      | 0.0398   | 0.1995   |       |
|          | Proportion[High] | 0.0013   | 0.0360   | -0.11 |
| Residual |                  | 0.0567   | 0.7528   |       |

Number of obs: 7064, groups: item, 160; subject, 48.

Fixed effects:

|                                                                                   | Estimate | Std. Error | df      | t value | Pr(> t ) |
|-----------------------------------------------------------------------------------|----------|------------|---------|---------|----------|
| (Intercept)                                                                       | -0.0034  | 0.031      | 51      | -0.11   | 0.91     |
| scale(BL)                                                                         | 0.62     | 0.0096     | 7e+03   | 64      | 0        |
| Consistency[consistent]                                                           | 0.016    | 0.0095     | 6.8e+03 | 1.7     | 0.086    |
| Proportion[High]                                                                  | -0.0043  | 0.012      | 60      | -0.36   | 0.72     |
| Order[High-equal]                                                                 | -0.0016  | 0.03       | 49      | -0.051  | 0.96     |
| scale(cloze)                                                                      | -0.0027  | 0.016      | 6.3e+02 | -0.17   | 0.87     |
| scale(BL):Consistency[consistent]                                                 | 0.015    | 0.0095     | 7e+03   | 1.5     | 0.13     |
| scale(BL):Proportion[High]                                                        | -0.0097  | 0.0096     | 6.7e+03 | -1      | 0.31     |
| Consistency[consistent]:Proportion[High]                                          | -0.0051  | 0.0095     | 6.8e+03 | -0.54   | 0.59     |
| scale(BL):Order[High-equal]                                                       | -0.015   | 0.0096     | 7e+03   | -1.6    | 0.11     |
| Consistency[consistent]:Order[High-equal]                                         | 0.026    | 0.0095     | 6.8e+03 | 2.7     | 0.0068   |
| Proportion[High]:Order[High-equal]                                                | -0.0026  | 0.011      | 55      | -0.24   | 0.81     |
| scale(BL):scale(cloze)                                                            | -0.00072 | 0.015      | 6.9e+03 | -0.048  | 0.96     |
| Consistency[consistent]:scale(cloze)                                              | 0.011    | 0.016      | 1.1e+03 | 0.71    | 0.48     |
| Proportion[High]:scale(cloze)                                                     | 0.017    | 0.016      | 6.3e+02 | 1.1     | 0.27     |
| Order[High-equal]:scale(cloze)                                                    | 0.0011   | 0.015      | 6.8e+03 | 0.075   | 0.94     |
| scale(BL):Consistency[consistent]:Proportion[High]                                | -0.016   | 0.0095     | 7e+03   | -1.7    | 0.089    |
| scale(BL):Consistency[consistent]:Order[High-equal]                               | 0.019    | 0.0095     | 7e+03   | 2       | 0.048    |
| scale(BL):Proportion[High]:Order[High-equal]                                      | -0.0047  | 0.0095     | 6.7e+03 | -0.5    | 0.62     |
| Consistency[consistent]:Proportion[High]:Order[High-equal]                        | 0.0014   | 0.0095     | 6.8e+03 | 0.14    | 0.89     |
| scale(BL):Consistency[consistent]:scale(cloze)                                    | -0.0074  | 0.015      | 6.9e+03 | -0.49   | 0.63     |
| scale(BL):Proportion[High]:scale(cloze)                                           | 0.02     | 0.015      | 6.9e+03 | 1.3     | 0.2      |
| Consistency[consistent]:Proportion[High]:scale(cloze)                             | -0.017   | 0.016      | 1.1e+03 | -1.1    | 0.28     |
| scale(BL):Order[High-equal]:scale(cloze)                                          | -0.038   | 0.015      | 6.9e+03 | -2.5    | 0.012    |
| Consistency[consistent]:Order[High-equal]:scale(cloze)                            | -0.016   | 0.015      | 6.8e+03 | -1.1    | 0.28     |
| Proportion[High]:Order[High-equal]:scale(cloze)                                   | -0.0012  | 0.015      | 6.8e+03 | -0.083  | 0.93     |
| scale(BL):Consistency[consistent]:Proportion[High]:Order[High-equal]              | -0.0055  | 0.0095     | 7e+03   | -0.58   | 0.56     |
| scale(BL):Consistency[consistent]:Proportion[High]:scale(cloze)                   | -0.0091  | 0.015      | 6.9e+03 | -0.6    | 0.55     |
| scale(BL):Consistency[consistent]:Order[High-equal]:scale(cloze)                  | 0.031    | 0.015      | 6.9e+03 | 2.1     | 0.04     |
| scale(BL):Proportion[High]:Order[High-equal]:scale(cloze)                         | 0.039    | 0.015      | 6.9e+03 | 2.6     | 0.0096   |
| Consistency[consistent]:Proportion[High]:Order[High-equal]:scale(cloze)           | -0.005   | 0.015      | 6.9e+03 | -0.33   | 0.74     |
| scale(BL):Consistency[consistent]:Proportion[High]:Order[High-equal]:scale(cloze) | -0.024   | 0.015      | 6.9e+03 | -1.6    | 0.11     |

Table S3: Analysis of deviance (Type II Wald chi-square tests) for the N400 (300–600 ms) time window.

|                                                     | Chisq    | Df | Pr(>Chisq) |
|-----------------------------------------------------|----------|----|------------|
| scale(BL)                                           | 4591.712 | 1  | 0.000      |
| Consistency                                         | 2.249    | 1  | 0.134      |
| Proportion                                          | 0.553    | 1  | 0.457      |
| Order                                               | 0.021    | 1  | 0.884      |
| scale(cloze)                                        | 0.670    | 1  | 0.413      |
| scale(BL):Consistency                               | 1.999    | 1  | 0.157      |
| scale(BL):Proportion                                | 1.647    | 1  | 0.199      |
| Consistency:Proportion                              | 0.054    | 1  | 0.816      |
| scale(BL):Order                                     | 0.681    | 1  | 0.409      |
| Consistency:Order                                   | 8.285    | 1  | 0.004      |
| Proportion:Order                                    | 0.120    | 1  | 0.729      |
| scale(BL):scale(cloze)                              | 0.787    | 1  | 0.375      |
| Consistency:scale(cloze)                            | 0.004    | 1  | 0.947      |
| Proportion:scale(cloze)                             | 0.212    | 1  | 0.645      |
| Order:scale(cloze)                                  | 0.844    | 1  | 0.358      |
| scale(BL):Consistency:Proportion                    | 2.496    | 1  | 0.114      |
| scale(BL):Consistency:Order                         | 2.305    | 1  | 0.129      |
| scale(BL):Proportion:Order                          | 1.345    | 1  | 0.246      |
| Consistency:Proportion:Order                        | 0.069    | 1  | 0.793      |
| scale(BL):Consistency:scale(cloze)                  | 2.054    | 1  | 0.152      |
| scale(BL):Proportion:scale(cloze)                   | 1.105    | 1  | 0.293      |
| Consistency:Proportion:scale(cloze)                 | 0.820    | 1  | 0.365      |
| scale(BL):Order:scale(cloze)                        | 0.321    | 1  | 0.571      |
| Consistency:Order:scale(cloze)                      | 3.919    | 1  | 0.048      |
| Proportion:Order:scale(cloze)                       | 0.224    | 1  | 0.636      |
| scale(BL):Consistency:Proportion:Order              | 0.038    | 1  | 0.845      |
| scale(BL):Consistency:Proportion:scale(cloze)       | 0.208    | 1  | 0.648      |
| scale(BL):Consistency:Order:scale(cloze)            | 1.667    | 1  | 0.197      |
| scale(BL):Proportion:Order:scale(cloze)             | 4.170    | 1  | 0.041      |
| Consistency:Proportion:Order:scale(cloze)           | 0.059    | 1  | 0.808      |
| scale(BL):Consistency:Proportion:Order:scale(cloze) | 2.558    | 1  | 0.110      |

Table S4: Summary of linear mixed effect model with trials as an additional predictor for the N400 (300–600ms) time window. Summary of model produced by the call `lmer(formula = scale(N400) ~ scale(BL) * Consistency * Proportion * Order * (scale(cloze) + scale(Trials)) + (Proportion | subject) + (1 | item), data = cv.N400, REML = FALSE, control = lmerControl(optimizer = "bobyqa", optCtrl = list(maxfun = 1e+06)))`

Linear mixed model fit by maximum likelihood . t-tests use Satterthwaite's method

|       |       |        |          |          |
|-------|-------|--------|----------|----------|
| AIC   | BIC   | logLik | deviance | df.resid |
| 16271 | 16635 | -8083  | 16165    | 7011     |

Scaled residuals:

|       |       |        |      |      |
|-------|-------|--------|------|------|
| Min   | 1Q    | Median | 3Q   | Max  |
| -5.35 | -0.62 | -0.01  | 0.63 | 4.77 |

Random effects:

| Groups   | Name             | Variance | Std.Dev. | Corr  |
|----------|------------------|----------|----------|-------|
| item     | (Intercept)      | 0.0026   | 0.0514   |       |
| subject  | (Intercept)      | 0.0395   | 0.1988   |       |
|          | Proportion[High] | 0.0014   | 0.0370   | -0.10 |
| Residual |                  | 0.5642   | 0.7512   |       |

Number of obs: 7064, groups: item, 160; subject, 48.

Fixed effects:

|                                                                                    | Estimate | Std. Error | df      | t value | Pr(> t ) |
|------------------------------------------------------------------------------------|----------|------------|---------|---------|----------|
| (Intercept)                                                                        | -0.0098  | 0.034      | 80      | -0.29   | 0.78     |
| scale(BL)                                                                          | 0.63     | 0.019      | 7e+03   | 34      | 1.1e-230 |
| Consistency[consistent]                                                            | -0.015   | 0.018      | 7e+03   | -0.82   | 0.41     |
| Proportion[High]                                                                   | -0.019   | 0.019      | 4.4e+02 | -0.96   | 0.34     |
| Order[High-equal]                                                                  | -0.01    | 0.035      | 82      | -0.29   | 0.77     |
| scale(cloze)                                                                       | -0.0023  | 0.016      | 6.1e+02 | -0.14   | 0.89     |
| scale(Trials)                                                                      | -0.03    | 0.02       | 1.6e+02 | -1.5    | 0.13     |
| scale(BL):Consistency[consistent]                                                  | -0.045   | 0.019      | 7e+03   | -2.4    | 0.016    |
| scale(BL):Proportion[High]                                                         | -0.017   | 0.019      | 7e+03   | -0.92   | 0.36     |
| Consistency[consistent]:Proportion[High]                                           | 0.0071   | 0.018      | 7e+03   | 0.39    | 0.7      |
| scale(BL):Order[High-equal]                                                        | -0.008   | 0.019      | 7e+03   | -0.42   | 0.67     |
| Consistency[consistent]:Order[High-equal]                                          | 0.043    | 0.018      | 6.9e+03 | 2.4     | 0.018    |
| Proportion[High]:Order[High-equal]                                                 | -0.029   | 0.02       | 2.1e+02 | -1.4    | 0.16     |
| scale(BL):scale(cloze)                                                             | -0.0043  | 0.015      | 6.9e+03 | -0.28   | 0.78     |
| scale(BL):scale(Trials)                                                            | 0.046    | 0.019      | 7e+03   | 2.5     | 0.014    |
| Consistency[consistent]:scale(cloze)                                               | 0.015    | 0.016      | 1e+03   | 0.96    | 0.34     |
| Consistency[consistent]:scale(Trials)                                              | -0.031   | 0.018      | 6.9e+03 | -1.7    | 0.084    |
| Proportion[High]:scale(cloze)                                                      | 0.019    | 0.016      | 6.1e+02 | 1.2     | 0.23     |
| Proportion[High]:scale(Trials)                                                     | -0.01    | 0.02       | 1.6e+02 | -0.51   | 0.61     |
| Order[High-equal]:scale(cloze)                                                     | 0.0044   | 0.015      | 6.8e+03 | 0.29    | 0.77     |
| Order[High-equal]:scale(Trials)                                                    | -0.016   | 0.018      | 6.9e+03 | -0.9    | 0.37     |
| scale(BL):Consistency[consistent]:Proportion[High]                                 | 0.0063   | 0.019      | 7e+03   | 0.34    | 0.74     |
| scale(BL):Consistency[consistent]:Order[High-equal]                                | 0.0099   | 0.019      | 7e+03   | 0.53    | 0.6      |
| scale(BL):Proportion[High]:Order[High-equal]                                       | 0.035    | 0.019      | 7e+03   | 1.8     | 0.064    |
| Consistency[consistent]:Proportion[High]:Order[High-equal]                         | -0.025   | 0.018      | 6.9e+03 | -1.4    | 0.17     |
| scale(BL):Consistency[consistent]:scale(cloze)                                     | -0.0055  | 0.015      | 7e+03   | -0.36   | 0.72     |
| scale(BL):Consistency[consistent]:scale(Trials)                                    | -0.0036  | 0.019      | 7e+03   | -0.2    | 0.84     |
| scale(BL):Proportion[High]:scale(cloze)                                            | 0.022    | 0.015      | 6.9e+03 | 1.4     | 0.15     |
| scale(BL):Proportion[High]:scale(Trials)                                           | 0.0086   | 0.019      | 7e+03   | 0.46    | 0.64     |
| Consistency[consistent]:Proportion[High]:scale(cloze)                              | -0.019   | 0.016      | 1e+03   | -1.2    | 0.23     |
| Consistency[consistent]:Proportion[High]:scale(Trials)                             | 0.021    | 0.018      | 7e+03   | 1.2     | 0.25     |
| scale(BL):Order[High-equal]:scale(cloze)                                           | -0.031   | 0.015      | 6.9e+03 | -2      | 0.042    |
| scale(BL):Order[High-equal]:scale(Trials)                                          | -0.0096  | 0.019      | 7e+03   | -0.52   | 0.61     |
| Consistency[consistent]:Order[High-equal]:scale(cloze)                             | -0.02    | 0.015      | 6.8e+03 | -1.3    | 0.19     |
| Consistency[consistent]:Order[High-equal]:scale(Trials)                            | 0.015    | 0.018      | 6.8e+03 | 0.81    | 0.42     |
| Proportion[High]:Order[High-equal]:scale(cloze)                                    | -0.0025  | 0.015      | 6.8e+03 | -0.17   | 0.87     |
| Proportion[High]:Order[High-equal]:scale(Trials)                                   | -0.007   | 0.018      | 6.9e+03 | -0.38   | 0.7      |
| scale(BL):Consistency[consistent]:Proportion[High]:Order[High-equal]               | -0.0079  | 0.019      | 7e+03   | -0.42   | 0.67     |
| scale(BL):Consistency[consistent]:Proportion[High]:scale(cloze)                    | -0.013   | 0.015      | 7e+03   | -0.87   | 0.38     |
| scale(BL):Consistency[consistent]:Proportion[High]:scale(Trials)                   | -0.0099  | 0.019      | 7e+03   | -0.53   | 0.6      |
| scale(BL):Consistency[consistent]:Order[High-equal]:scale(cloze)                   | 0.023    | 0.015      | 6.9e+03 | 1.5     | 0.13     |
| scale(BL):Consistency[consistent]:Order[High-equal]:scale(Trials)                  | 0.025    | 0.019      | 7e+03   | 1.3     | 0.19     |
| scale(BL):Proportion[High]:Order[High-equal]:scale(cloze)                          | 0.034    | 0.015      | 6.9e+03 | 2.2     | 0.028    |
| scale(BL):Proportion[High]:Order[High-equal]:scale(Trials)                         | 0.016    | 0.019      | 7e+03   | 0.86    | 0.39     |
| Consistency[consistent]:Proportion[High]:Order[High-equal]:scale(cloze)            | 1.1e-05  | 0.015      | 6.9e+03 | 0.00073 | 1        |
| Consistency[consistent]:Proportion[High]:Order[High-equal]:scale(Trials)           | -0.037   | 0.018      | 6.8e+03 | -2      | 0.042    |
| scale(BL):Consistency[consistent]:Proportion[High]:Order[High-equal]:scale(cloze)  | -0.015   | 0.015      | 6.9e+03 | -0.97   | 0.33     |
| scale(BL):Consistency[consistent]:Proportion[High]:Order[High-equal]:scale(Trials) | -0.069   | 0.019      | 7e+03   | -3.7    | 0.0002   |

Table S5: Analysis of deviance (Type II Wald chi-square tests) in the N400 (300–600 ms) time window for models with trials as an additional predictor.

|                                                      | Chisq    | Df | Pr(>Chisq) |
|------------------------------------------------------|----------|----|------------|
| scale(BL)                                            | 4616.930 | 1  | 0.000      |
| Consistency                                          | 2.170    | 1  | 0.141      |
| Proportion                                           | 1.312    | 1  | 0.252      |
| Order                                                | 0.178    | 1  | 0.673      |
| scale(cloze)                                         | 1.207    | 1  | 0.272      |
| scale(Trials)                                        | 2.230    | 1  | 0.135      |
| scale(BL):Consistency                                | 1.944    | 1  | 0.163      |
| scale(BL):Proportion                                 | 1.502    | 1  | 0.220      |
| Consistency:Proportion                               | 0.516    | 1  | 0.472      |
| scale(BL):Order                                      | 0.008    | 1  | 0.929      |
| Consistency:Order                                    | 5.682    | 1  | 0.017      |
| Proportion:Order                                     | 2.081    | 1  | 0.149      |
| scale(BL):scale(cloze)                               | 0.489    | 1  | 0.484      |
| scale(BL):scale(Trials)                              | 6.313    | 1  | 0.012      |
| Consistency:scale(cloze)                             | 0.110    | 1  | 0.741      |
| Consistency:scale(Trials)                            | 2.629    | 1  | 0.105      |
| Proportion:scale(cloze)                              | 0.241    | 1  | 0.623      |
| Proportion:scale(Trials)                             | 0.299    | 1  | 0.585      |
| Order:scale(cloze)                                   | 0.515    | 1  | 0.473      |
| Order:scale(Trials)                                  | 0.810    | 1  | 0.368      |
| scale(BL):Consistency:Proportion                     | 0.139    | 1  | 0.709      |
| scale(BL):Consistency:Order                          | 0.319    | 1  | 0.572      |
| scale(BL):Proportion:Order                           | 2.602    | 1  | 0.107      |
| Consistency:Proportion:Order                         | 1.683    | 1  | 0.194      |
| scale(BL):Consistency:scale(cloze)                   | 2.266    | 1  | 0.132      |
| scale(BL):Consistency:scale(Trials)                  | 0.175    | 1  | 0.676      |
| scale(BL):Proportion:scale(cloze)                    | 1.067    | 1  | 0.302      |
| scale(BL):Proportion:scale(Trials)                   | 0.114    | 1  | 0.736      |
| Consistency:Proportion:scale(cloze)                  | 1.157    | 1  | 0.282      |
| Consistency:Proportion:scale(Trials)                 | 1.254    | 1  | 0.263      |
| scale(BL):Order:scale(cloze)                         | 0.169    | 1  | 0.681      |
| scale(BL):Order:scale(Trials)                        | 0.228    | 1  | 0.633      |
| Consistency:Order:scale(cloze)                       | 3.939    | 1  | 0.047      |
| Consistency:Order:scale(Trials)                      | 0.959    | 1  | 0.327      |
| Proportion:Order:scale(cloze)                        | 0.061    | 1  | 0.804      |
| Proportion:Order:scale(Trials)                       | 0.164    | 1  | 0.686      |
| scale(BL):Consistency:Proportion:Order               | 0.159    | 1  | 0.690      |
| scale(BL):Consistency:Proportion:scale(cloze)        | 0.632    | 1  | 0.427      |
| scale(BL):Consistency:Proportion:scale(Trials)       | 0.131    | 1  | 0.717      |
| scale(BL):Consistency:Order:scale(cloze)             | 1.407    | 1  | 0.235      |
| scale(BL):Consistency:Order:scale(Trials)            | 1.356    | 1  | 0.244      |
| scale(BL):Proportion:Order:scale(cloze)              | 4.270    | 1  | 0.039      |
| scale(BL):Proportion:Order:scale(Trials)             | 1.019    | 1  | 0.313      |
| Consistency:Proportion:Order:scale(cloze)            | 0.004    | 1  | 0.953      |
| Consistency:Proportion:Order:scale(Trials)           | 4.268    | 1  | 0.039      |
| scale(BL):Consistency:Proportion:Order:scale(cloze)  | 0.935    | 1  | 0.334      |
| scale(BL):Consistency:Proportion:Order:scale(Trials) | 13.853   | 1  | 0.000      |

Table S6: Summary of linear mixed effect model for the LN (650–1000 ms) time window. Summary of model produced by the call `lmer(formula = scale(LN) ~ scale(BL) * Consistency * Proportion * Order * scale(cloze) + (Proportion | subject) + (1 | item), data = cv.LN, REML = FALSE, control = lmerControl(optimizer = "bobyqa", optCtrl = list(maxfun = 1e+06)))`

Linear mixed model fit by maximum likelihood . t-tests use Satterthwaite’s method

| AIC   | BIC   | logLik | deviance | df.resid |
|-------|-------|--------|----------|----------|
| 18055 | 18309 | -8990  | 17981    | 7027     |

Scaled residuals:

| Min   | 1Q    | Median | 3Q   | Max  |
|-------|-------|--------|------|------|
| -5.02 | -0.61 | -0.01  | 0.62 | 6.07 |

Random effects:

| Groups   | Name             | Variance | Std.Dev. | Corr  |
|----------|------------------|----------|----------|-------|
| item     | (Intercept)      | 0.0000   | 0.0000   |       |
| subject  | (Intercept)      | 0.02888  | 0.1699   |       |
|          | Proportion[High] | 0.0008   | 0.0282   | -0.38 |
| Residual |                  | 0.7361   | 0.8580   |       |

Number of obs: 7064, groups: item, 160; subject, 48.

Fixed effects:

|                                                                                   | Estimate | Std. Error | df      | t value | Pr(> t ) |
|-----------------------------------------------------------------------------------|----------|------------|---------|---------|----------|
| (Intercept)                                                                       | −0.0054  | 0.027      | 49      | −0.2    | 0.84     |
| scale(BL)                                                                         | 0.46     | 0.011      | 7.1e+03 | 42      | 0        |
| Consistency[consistent]                                                           | 0.018    | 0.011      | 7e+03   | 1.7     | 0.094    |
| Proportion[High]                                                                  | 0.014    | 0.012      | 57      | 1.2     | 0.22     |
| Order[High-equal]                                                                 | 0.034    | 0.027      | 49      | 1.3     | 0.21     |
| scale(cloze)                                                                      | −0.041   | 0.017      | 7e+03   | −2.4    | 0.018    |
| scale(BL):Consistency[consistent]                                                 | 0.02     | 0.011      | 7e+03   | 1.9     | 0.064    |
| scale(BL):Proportion[High]                                                        | −0.0097  | 0.011      | 6.7e+03 | −0.9    | 0.37     |
| Consistency[consistent]:Proportion[High]                                          | −0.00053 | 0.011      | 7e+03   | −0.049  | 0.96     |
| scale(BL):Order[High-equal]                                                       | −0.028   | 0.011      | 7.1e+03 | −2.6    | 0.01     |
| Consistency[consistent]:Order[High-equal]                                         | 0.025    | 0.011      | 7e+03   | 2.4     | 0.018    |
| Proportion[High]:Order[High-equal]                                                | −0.02    | 0.012      | 57      | −1.7    | 0.093    |
| scale(BL):scale(cloze)                                                            | −0.013   | 0.017      | 7e+03   | −0.74   | 0.46     |
| Consistency[consistent]:scale(cloze)                                              | 0.024    | 0.017      | 7e+03   | 1.4     | 0.17     |
| Proportion[High]:scale(cloze)                                                     | 0.039    | 0.017      | 7e+03   | 2.3     | 0.022    |
| Order[High-equal]:scale(cloze)                                                    | −0.00073 | 0.017      | 7e+03   | −0.042  | 0.97     |
| scale(BL):Consistency[consistent]:Proportion[High]                                | −0.0084  | 0.011      | 7e+03   | −0.78   | 0.44     |
| scale(BL):Consistency[consistent]:Order[High-equal]                               | 0.031    | 0.011      | 7e+03   | 2.9     | 0.004    |
| scale(BL):Proportion[High]:Order[High-equal]                                      | 0.02     | 0.011      | 6.7e+03 | 1.8     | 0.07     |
| Consistency[consistent]:Proportion[High]:Order[High-equal]                        | −0.0051  | 0.011      | 7e+03   | −0.48   | 0.63     |
| scale(BL):Consistency[consistent]:scale(cloze)                                    | 0.034    | 0.017      | 7e+03   | 2       | 0.049    |
| scale(BL):Proportion[High]:scale(cloze)                                           | 0.044    | 0.017      | 7e+03   | 2.6     | 0.011    |
| Consistency[consistent]:Proportion[High]:scale(cloze)                             | −0.028   | 0.017      | 7e+03   | −1.6    | 0.11     |
| scale(BL):Order[High-equal]:scale(cloze)                                          | −0.088   | 0.017      | 7e+03   | −5.2    | 2.4e−07  |
| Consistency[consistent]:Order[High-equal]:scale(cloze)                            | −0.016   | 0.017      | 7e+03   | −0.95   | 0.34     |
| Proportion[High]:Order[High-equal]:scale(cloze)                                   | −0.01    | 0.017      | 7e+03   | −0.61   | 0.54     |
| scale(BL):Consistency[consistent]:Proportion[High]:Order[High-equal]              | −0.0014  | 0.011      | 7e+03   | −0.13   | 0.89     |
| scale(BL):Consistency[consistent]:Proportion[High]:scale(cloze)                   | −0.042   | 0.017      | 7e+03   | −2.5    | 0.013    |
| scale(BL):Consistency[consistent]:Order[High-equal]:scale(cloze)                  | 0.088    | 0.017      | 7e+03   | 5.2     | 2.6e−07  |
| scale(BL):Proportion[High]:Order[High-equal]:scale(cloze)                         | 0.096    | 0.017      | 7e+03   | 5.6     | 2.2e−08  |
| Consistency[consistent]:Proportion[High]:Order[High-equal]:scale(cloze)           | 0.0064   | 0.017      | 7e+03   | 0.37    | 0.71     |
| scale(BL):Consistency[consistent]:Proportion[High]:Order[High-equal]:scale(cloze) | −0.079   | 0.017      | 7e+03   | −4.6    | 3.6e−06  |

Table S7: Analysis of deviance (Type II Wald chi-square tests) for the LN (650–1000 ms) time window.

|                                                     | Chisq    | Df | Pr(>Chisq) |
|-----------------------------------------------------|----------|----|------------|
| scale(BL)                                           | 2000.519 | 1  | 0.000      |
| Consistency                                         | 1.339    | 1  | 0.247      |
| Proportion                                          | 0.405    | 1  | 0.525      |
| Order                                               | 0.927    | 1  | 0.336      |
| scale(cloze)                                        | 1.854    | 1  | 0.173      |
| scale(BL):Consistency                               | 1.438    | 1  | 0.231      |
| scale(BL):Proportion                                | 3.210    | 1  | 0.073      |
| Consistency:Proportion                              | 0.266    | 1  | 0.606      |
| scale(BL):Order                                     | 0.618    | 1  | 0.432      |
| Consistency:Order                                   | 6.177    | 1  | 0.013      |
| Proportion:Order                                    | 2.920    | 1  | 0.087      |
| scale(BL):scale(cloze)                              | 5.694    | 1  | 0.017      |
| Consistency:scale(cloze)                            | 0.041    | 1  | 0.840      |
| Proportion:scale(cloze)                             | 1.910    | 1  | 0.167      |
| Order:scale(cloze)                                  | 1.632    | 1  | 0.201      |
| scale(BL):Consistency:Proportion                    | 0.037    | 1  | 0.847      |
| scale(BL):Consistency:Order                         | 2.538    | 1  | 0.111      |
| scale(BL):Proportion:Order                          | 0.079    | 1  | 0.779      |
| Consistency:Proportion:Order                        | 0.228    | 1  | 0.633      |
| scale(BL):Consistency:scale(cloze)                  | 0.001    | 1  | 0.982      |
| scale(BL):Proportion:scale(cloze)                   | 0.966    | 1  | 0.326      |
| Consistency:Proportion:scale(cloze)                 | 1.185    | 1  | 0.276      |
| scale(BL):Order:scale(cloze)                        | 0.315    | 1  | 0.575      |
| Consistency:Order:scale(cloze)                      | 1.426    | 1  | 0.232      |
| Proportion:Order:scale(cloze)                       | 0.447    | 1  | 0.504      |
| scale(BL):Consistency:Proportion:Order              | 1.005    | 1  | 0.316      |
| scale(BL):Consistency:Proportion:scale(cloze)       | 4.117    | 1  | 0.042      |
| scale(BL):Consistency:Order:scale(cloze)            | 6.564    | 1  | 0.010      |
| scale(BL):Proportion:Order:scale(cloze)             | 11.784   | 1  | 0.001      |
| Consistency:Proportion:Order:scale(cloze)           | 0.514    | 1  | 0.473      |
| scale(BL):Consistency:Proportion:Order:scale(cloze) | 21.496   | 1  | 0.000      |

Table S8: Summary of linear mixed effect model with trials as an additional predictor for the LN (650–1000 ms) time window. Summary of model produced by the call `lmer(formula = scale(LN) ~ scale(BL) * Consistency * Proportion * Order * (scale(cloze) + scale(Trials)) + (Proportion | subject) + (1 | item), data = cv.LN, REML = FALSE, control = lmerControl(optimizer = "bobyqa", optCtrl = list(maxfun = 1e+06)))`  
Linear mixed model fit by maximum likelihood . t-tests use Satterthwaite's method

|       |       |        |          |          |
|-------|-------|--------|----------|----------|
| AIC   | BIC   | logLik | deviance | df.resid |
| 18061 | 18424 | -8977  | 17955    | 7011     |

Scaled residuals:

|       |      |        |      |     |
|-------|------|--------|------|-----|
| Min   | 1Q   | Median | 3Q   | Max |
| -5.04 | -0.6 | -0.02  | 0.62 | 6.1 |

Random effects:

| Groups   | Name             | Variance  | Std.Dev. | Corr  |
|----------|------------------|-----------|----------|-------|
| item     | (Intercept)      | 1.108e-15 | 3.33e-08 |       |
| subject  | (Intercept)      | 2.908e-02 | 1.71e-01 |       |
|          | Proportion[High] | 9.658e-04 | 3.11e-02 | -0.32 |
| Residual |                  | 7.332e-01 | 8.56e-01 |       |

Number of obs: 7064, groups: item, 160; subject, 48.

Fixed effects:

|                                                                                    | Estimate | Std. Error | df      | t value  | Pr(> t ) |
|------------------------------------------------------------------------------------|----------|------------|---------|----------|----------|
| (Intercept)                                                                        | -0.014   | 0.032      | 1e+02   | -0.42    | 0.67     |
| scale(BL)                                                                          | 0.48     | 0.021      | 7e+03   | 23       | 1.8e-108 |
| Consistency[consistent]                                                            | -0.00036 | 0.021      | 7e+03   | -0.017   | 0.99     |
| Proportion[High]                                                                   | 0.022    | 0.021      | 5.9e+02 | 1        | 0.3      |
| Order[High-equal]                                                                  | 0.02     | 0.032      | 1e+02   | 0.63     | 0.53     |
| scale(cloze)                                                                       | -0.038   | 0.017      | 7e+03   | -2.2     | 0.027    |
| scale(Trials)                                                                      | -0.037   | 0.021      | 7e+03   | -1.8     | 0.072    |
| scale(BL):Consistency[consistent]                                                  | -0.019   | 0.021      | 7e+03   | -0.91    | 0.36     |
| scale(BL):Proportion[High]                                                         | -0.01    | 0.021      | 7e+03   | -0.48    | 0.63     |
| Consistency[consistent]:Proportion[High]                                           | 0.0065   | 0.021      | 7e+03   | 0.32     | 0.75     |
| scale(BL):Order[High-equal]                                                        | -0.024   | 0.021      | 7e+03   | -1.1     | 0.25     |
| Consistency[consistent]:Order[High-equal]                                          | 0.022    | 0.021      | 7e+03   | 1.1      | 0.28     |
| Proportion[High]:Order[High-equal]                                                 | -0.052   | 0.021      | 5.9e+02 | -2.4     | 0.015    |
| scale(BL):scale(cloze)                                                             | -0.012   | 0.017      | 7e+03   | -0.72    | 0.47     |
| scale(BL):scale(Trials)                                                            | 0.027    | 0.021      | 7e+03   | 1.3      | 0.2      |
| Consistency[consistent]:scale(cloze)                                               | 0.029    | 0.017      | 7e+03   | 1.7      | 0.094    |
| Consistency[consistent]:scale(Trials)                                              | -0.066   | 0.021      | 7e+03   | -3.2     | 0.0014   |
| Proportion[High]:scale(cloze)                                                      | 0.042    | 0.017      | 7e+03   | 2.5      | 0.014    |
| Proportion[High]:scale(Trials)                                                     | -0.016   | 0.021      | 7e+03   | -0.75    | 0.45     |
| Order[High-equal]:scale(cloze)                                                     | -1.3e-05 | 0.017      | 7e+03   | -0.00074 | 1        |
| Order[High-equal]:scale(Trials)                                                    | 0.0094   | 0.021      | 7e+03   | 0.45     | 0.65     |
| scale(BL):Consistency[consistent]:Proportion[High]                                 | -0.012   | 0.021      | 7e+03   | -0.56    | 0.57     |
| scale(BL):Consistency[consistent]:Order[High-equal]                                | 0.00094  | 0.021      | 7e+03   | 0.044    | 0.96     |
| scale(BL):Proportion[High]:Order[High-equal]                                       | 0.042    | 0.021      | 7e+03   | 2        | 0.045    |
| Consistency[consistent]:Proportion[High]:Order[High-equal]                         | -0.061   | 0.021      | 7e+03   | -2.9     | 0.0032   |
| scale(BL):Consistency[consistent]:scale(cloze)                                     | 0.034    | 0.017      | 7e+03   | 2        | 0.049    |
| scale(BL):Consistency[consistent]:scale(Trials)                                    | -0.0058  | 0.021      | 7e+03   | -0.27    | 0.78     |
| scale(BL):Proportion[High]:scale(cloze)                                            | 0.044    | 0.017      | 7e+03   | 2.6      | 0.01     |
| scale(BL):Proportion[High]:scale(Trials)                                           | 0.0043   | 0.021      | 7e+03   | 0.21     | 0.84     |
| Consistency[consistent]:Proportion[High]:scale(cloze)                              | -0.028   | 0.017      | 7e+03   | -1.6     | 0.1      |
| Consistency[consistent]:Proportion[High]:scale(Trials)                             | -0.004   | 0.021      | 7e+03   | -0.2     | 0.85     |
| scale(BL):Order[High-equal]:scale(cloze)                                           | -0.084   | 0.017      | 7e+03   | -4.9     | 1.3e-06  |
| scale(BL):Order[High-equal]:scale(Trials)                                          | -0.00038 | 0.021      | 7e+03   | -0.018   | 0.99     |
| Consistency[consistent]:Order[High-equal]:scale(cloze)                             | -0.018   | 0.017      | 7e+03   | -1       | 0.29     |
| Consistency[consistent]:Order[High-equal]:scale(Trials)                            | 0.0088   | 0.021      | 7e+03   | 0.42     | 0.67     |
| Proportion[High]:Order[High-equal]:scale(cloze)                                    | -0.01    | 0.017      | 7e+03   | -0.59    | 0.56     |
| Proportion[High]:Order[High-equal]:scale(Trials)                                   | -0.009   | 0.021      | 7e+03   | -0.43    | 0.67     |
| scale(BL):Consistency[consistent]:Proportion[High]:Order[High-equal]               | -0.0059  | 0.021      | 7e+03   | -0.28    | 0.78     |
| scale(BL):Consistency[consistent]:Proportion[High]:scale(cloze)                    | -0.043   | 0.017      | 7e+03   | -2.5     | 0.013    |
| scale(BL):Consistency[consistent]:Proportion[High]:scale(Trials)                   | -0.035   | 0.021      | 7e+03   | -1.7     | 0.095    |
| scale(BL):Consistency[consistent]:Order[High-equal]:scale(cloze)                   | 0.084    | 0.017      | 7e+03   | 4.8      | 1.4e-06  |
| scale(BL):Consistency[consistent]:Order[High-equal]:scale(Trials)                  | -0.0055  | 0.021      | 7e+03   | -0.26    | 0.79     |
| scale(BL):Proportion[High]:Order[High-equal]:scale(cloze)                          | 0.093    | 0.017      | 7e+03   | 5.4      | 7.2e-08  |
| scale(BL):Proportion[High]:Order[High-equal]:scale(Trials)                         | 0.027    | 0.021      | 7e+03   | 1.3      | 0.21     |
| Consistency[consistent]:Proportion[High]:Order[High-equal]:scale(cloze)            | 0.0084   | 0.017      | 7e+03   | 0.49     | 0.63     |
| Consistency[consistent]:Proportion[High]:Order[High-equal]:scale(Trials)           | -0.022   | 0.021      | 7e+03   | -1.1     | 0.28     |
| scale(BL):Consistency[consistent]:Proportion[High]:Order[High-equal]:scale(cloze)  | -0.074   | 0.017      | 7e+03   | -4.3     | 1.8e-05  |
| scale(BL):Consistency[consistent]:Proportion[High]:Order[High-equal]:scale(Trials) | -0.046   | 0.021      | 7e+03   | -2.2     | 0.03     |



Table S9: Analysis of deviance (Type II Wald chi-square tests) in the LN (600–1000 ms) time window for models with trials as an additional predictor.

|                                                      | Chisq    | Df | Pr(>Chisq) |
|------------------------------------------------------|----------|----|------------|
| scale(BL)                                            | 2010.553 | 1  | 0.000      |
| Consistency                                          | 1.274    | 1  | 0.259      |
| Proportion                                           | 0.558    | 1  | 0.455      |
| Order                                                | 0.171    | 1  | 0.679      |
| scale(cloze)                                         | 0.590    | 1  | 0.442      |
| scale(Trials)                                        | 3.089    | 1  | 0.079      |
| scale(BL):Consistency                                | 1.551    | 1  | 0.213      |
| scale(BL):Proportion                                 | 1.657    | 1  | 0.198      |
| Consistency:Proportion                               | 0.621    | 1  | 0.431      |
| scale(BL):Order                                      | 0.078    | 1  | 0.780      |
| Consistency:Order                                    | 1.192    | 1  | 0.275      |
| Proportion:Order                                     | 5.676    | 1  | 0.017      |
| scale(BL):scale(cloze)                               | 5.790    | 1  | 0.016      |
| scale(BL):scale(Trials)                              | 1.830    | 1  | 0.176      |
| Consistency:scale(cloze)                             | 0.355    | 1  | 0.551      |
| Consistency:scale(Trials)                            | 9.573    | 1  | 0.002      |
| Proportion:scale(cloze)                              | 2.520    | 1  | 0.112      |
| Proportion:scale(Trials)                             | 0.599    | 1  | 0.439      |
| Order:scale(cloze)                                   | 1.506    | 1  | 0.220      |
| Order:scale(Trials)                                  | 0.175    | 1  | 0.675      |
| scale(BL):Consistency:Proportion                     | 0.024    | 1  | 0.878      |
| scale(BL):Consistency:Order                          | 0.224    | 1  | 0.636      |
| scale(BL):Proportion:Order                           | 1.687    | 1  | 0.194      |
| Consistency:Proportion:Order                         | 8.717    | 1  | 0.003      |
| scale(BL):Consistency:scale(cloze)                   | 0.002    | 1  | 0.967      |
| scale(BL):Consistency:scale(Trials)                  | 0.185    | 1  | 0.667      |
| scale(BL):Proportion:scale(cloze)                    | 1.037    | 1  | 0.309      |
| scale(BL):Proportion:scale(Trials)                   | 0.037    | 1  | 0.848      |
| Consistency:Proportion:scale(cloze)                  | 1.334    | 1  | 0.248      |
| Consistency:Proportion:scale(Trials)                 | 0.048    | 1  | 0.827      |
| scale(BL):Order:scale(cloze)                         | 0.186    | 1  | 0.666      |
| scale(BL):Order:scale(Trials)                        | 0.007    | 1  | 0.935      |
| Consistency:Order:scale(cloze)                       | 1.506    | 1  | 0.220      |
| Consistency:Order:scale(Trials)                      | 0.271    | 1  | 0.603      |
| Proportion:Order:scale(cloze)                        | 0.283    | 1  | 0.595      |
| Proportion:Order:scale(Trials)                       | 0.199    | 1  | 0.656      |
| scale(BL):Consistency:Proportion:Order               | 0.022    | 1  | 0.881      |
| scale(BL):Consistency:Proportion:scale(cloze)        | 4.332    | 1  | 0.037      |
| scale(BL):Consistency:Proportion:scale(Trials)       | 2.440    | 1  | 0.118      |
| scale(BL):Consistency:Order:scale(cloze)             | 6.109    | 1  | 0.013      |
| scale(BL):Consistency:Order:scale(Trials)            | 0.124    | 1  | 0.725      |
| scale(BL):Proportion:Order:scale(cloze)              | 11.886   | 1  | 0.001      |
| scale(BL):Proportion:Order:scale(Trials)             | 1.900    | 1  | 0.168      |
| Consistency:Proportion:Order:scale(cloze)            | 0.666    | 1  | 0.414      |
| Consistency:Proportion:Order:scale(Trials)           | 1.220    | 1  | 0.269      |
| scale(BL):Consistency:Proportion:Order:scale(cloze)  | 18.365   | 1  | 0.000      |
| scale(BL):Consistency:Proportion:Order:scale(Trials) | 4.730    | 1  | 0.030      |
